# Supplementary material for: Unraveling the effect of particle size of active metals in Ni/MgO on methane activation and carbon growth mechanism
Source: Royal Society of Chemistry journal article supplement (doi:10.1039/d3cp05435g), 2023-12-15
Supplement: d3cp05435g1.pdf [file d3cp05435g1.pdf]

## Supporting Information

### **Unraveling the role of particle size of active metal for Ni/MgO on methane activation and carbon growth mechanism**

**Shengzhuo Chen<sup>a</sup>, Juntian Niu<sup>a\*</sup>, Xianrong Zheng<sup>a</sup>, Haiyu Liu<sup>a</sup>, Yan Jin<sup>a</sup>, Jingyu**

**Ran<sup>b</sup>**

<sup>a</sup> College of Electrical and Power Engineering, Taiyuan University of Technology,  
Taiyuan 030024, Shanxi, China

<sup>b</sup> Key Laboratory of Low-grade Energy Utilization Technologies and Systems  
(Chongqing University), Ministry of Education of China, Chongqing University,  
Chongqing 400044, China

\*Corresponding authors: Juntian Niu

E-mail: [juntianniu@163.com](mailto:juntianniu@163.com)

Table S1 Frequency of CH<sub>x</sub> on the Ni<sub>x</sub>/MgO

| Ni13/MgO            | CH <sub>4</sub> →CH <sub>3</sub> +H | CH <sub>3</sub> →CH <sub>2</sub> +H | CH <sub>2</sub> →CH+H | CH→C+H   |
|---------------------|-------------------------------------|-------------------------------------|-----------------------|----------|
| Frequency<br>(1/cm) | -523.13                             | -938.82                             | -665.88               | -1010.97 |
|                     | 65.22                               | 142.50                              | 234.48                | 274.65   |
|                     | 222.04                              | 214.51                              | 285.41                | 294.62   |
|                     | 254.41                              | 377.58                              | 287.18                | 355.65   |
|                     | 331.27                              | 413.35                              | 459.07                | 426.78   |
|                     | 526.52                              | 496.73                              | 507.47                | 1148.26  |
|                     | 550.89                              | 656.58                              | 725.94                |          |
|                     | 861.05                              | 800.38                              | 1455.67               |          |
|                     | 972.47                              | 1215.82                             | 2958.81               |          |
|                     | 1041.17                             | 1290.25                             |                       |          |
|                     | 1319.66                             | 2852.87                             |                       |          |
|                     | 1324.99                             | 2956.31                             |                       |          |
|                     | 2892.64                             |                                     |                       |          |
|                     | 3006.18                             |                                     |                       |          |
|                     | 3021.60                             |                                     |                       |          |

| Ni25/MgO            | CH <sub>4</sub> →CH <sub>3</sub> +H | CH <sub>3</sub> →CH <sub>2</sub> +H | CH <sub>2</sub> →CH+H | CH→C+H  |
|---------------------|-------------------------------------|-------------------------------------|-----------------------|---------|
| Frequency<br>(1/cm) | -356.82                             | -825.02                             | -967.94               | -723.34 |
|                     | 24.18                               | 119.29                              | 225.05                | 101.52  |
|                     | 35.38                               | 199.42                              | 262.18                | 245.97  |
|                     | 141.49                              | 308.01                              | 307.71                | 361.47  |
|                     | 183.87                              | 355.67                              | 440.61                | 403.14  |
|                     | 332.61                              | 488.71                              | 527.99                | 818.86  |
|                     | 358.96                              | 633.40                              | 662.78                |         |
|                     | 568.21                              | 735.73                              | 1,144.69              |         |
|                     | 922.15                              | 1,259.71                            | 2,943.94              |         |
|                     | 1,046.71                            | 1,300.61                            |                       |         |
|                     | 1,298.02                            | 2,736.47                            |                       |         |
|                     | 1,313.58                            | 2,871.46                            |                       |         |
|                     | 2,990.77                            |                                     |                       |         |
|                     | 3,166.76                            |                                     |                       |         |
|                     | 3,206.05                            |                                     |                       |         |

| Ni37/MgO            | CH <sub>4</sub> →CH <sub>3</sub> +H | CH <sub>3</sub> →CH <sub>2</sub> +H | CH <sub>2</sub> →CH+H | CH→C+H  |
|---------------------|-------------------------------------|-------------------------------------|-----------------------|---------|
| Frequency<br>(1/cm) | -308.71                             | -1022.68                            | -1066.86              | -840.84 |
|                     | 25.63                               | 102.58                              | 157.29                | 271.30  |

|  |         |         |         |         |
|--|---------|---------|---------|---------|
|  | 36.13   | 109.74  | 347.15  | 325.58  |
|  | 124.54  | 268.45  | 415.17  | 357.99  |
|  | 103.97  | 391.33  | 456.27  | 403.54  |
|  | 213.88  | 480.52  | 486.57  | 1068.72 |
|  | 257.79  | 583.34  | 642.34  |         |
|  | 462.92  | 704.93  | 1050.89 |         |
|  | 652.20  | 1199.90 | 2952.30 |         |
|  | 1160.86 | 1400.64 |         |         |
|  | 1257.82 | 2878.43 |         |         |
|  | 1290.13 | 3031.73 |         |         |
|  | 3030.65 |         |         |         |
|  | 3210.86 |         |         |         |
|  | 3253.92 |         |         |         |
